# Supplementary material
Source: PubMed Central journal article supplement (PMC1253587)
Supplement: pnas_0506927102_1.pdf [file pnas_0506927102_1.pdf]

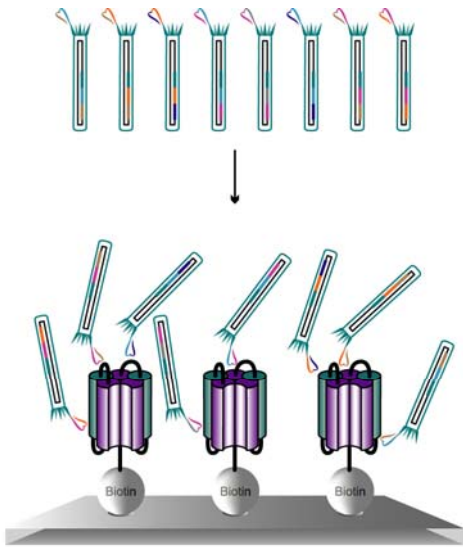

### Round 1

Naive scFv phage library panned across biotinylated 5-helix immobilized on a streptavidin plate to select scFvs that bind to 5-helix

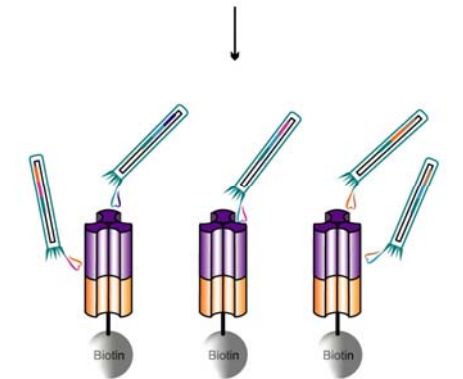

### Round 2

Soluble selection performed with Round 1 output on biotinylated IZN36 to enrich for scFvs that bind both 5-helix and IZN36

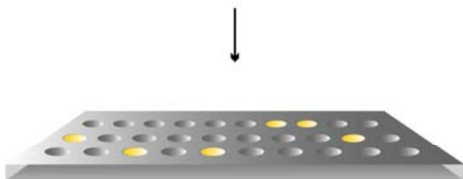

### Specificity ELISA

Phage supernatants prepared from single bacterial colonies to identify individual scFvs cross-specific for 5-helix and IZN36

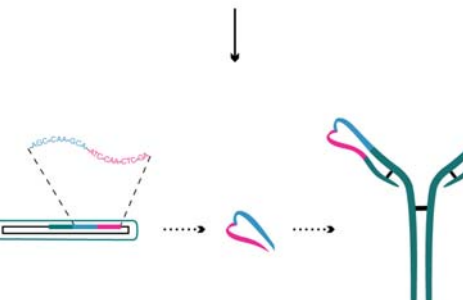

### ScFv Characterisation

Cross-specific antibodies DNA sequenced, expressed as soluble scFv fragments and IgG1 constructs and tested in viral neutralization assays
