# Supplementary material
Source: PubMed Central journal article supplement (PMC1253587)
Supplement: pnas_0506927102_5.pdf [file pnas_0506927102_5.pdf]

**Table 3.** Sequence of gp41 N HR-derived peptides and single-point alanine mutants of IZN17

| Peptide      | Sequence <sup>1-3</sup>                                                      |
|--------------|------------------------------------------------------------------------------|
| N Helix      | d a d a d a d a d a d a<br>QARQLLSGIVQQNNLLRAIEAQHLLQLTVWGIKQLQARILAVERYLK   |
| N36          | <u>SGIVQQNNLLRAIEAQHLLQLTVWGIKQLQARIL</u>                                    |
| N17          | <u>LLQLTVWGIKQLQARIL</u>                                                     |
| IZN36        | <i>IKKEIEAIKKEQEAIKKKIEAIEKEIS</i> <u>SGIVQQNNLLRAIEAQHLLQLTVWGIKQLQARIL</u> |
| IQN17        | <i>RMKQIEDKIEEIESKQKKIENEIARIKLL</i> <u>QLTVWGIKQLQARIL</u>                  |
| IZN17        | <i>IKKEIEAIKKEQEAIKKKIEAIEKLL</i> <u>QLTVWGIKQLQARIL</u>                     |
| IZN17[L565A] | <i>IKKEIEAIKKEQEAIKKKIEAIEK</i> <u>ALQLTVWGIKQLQARIL</u>                     |
| IZN17[Q567A] | <i>IKKEIEAIKKEQEAIKKKIEAIEKLL</i> <u>ALT</u> TVWGIKQLQARIL                   |
| IZN17[L568A] | <i>IKKEIEAIKKEQEAIKKKIEAIEKLL</i> <u>QAT</u> TVWGIKQLQARIL                   |
| IZN17[V570A] | <i>IKKEIEAIKKEQEAIKKKIEAIEKLL</i> <u>QLTAV</u> GIKQLQARIL                    |
| IZN17[W571A] | <i>IKKEIEAIKKEQEAIKKKIEAIEKLL</i> <u>QLTVAG</u> IKQLQARIL                    |
| IZN17[G572D] | <i>IKKEIEAIKKEQEAIKKKIEAIEKLL</i> <u>QLTVWD</u> IKQLQARIL                    |
| IZN17[K574A] | <i>IKKEIEAIKKEQEAIKKKIEAIEKLL</i> <u>QLTVWGIQA</u> QLQARIL                   |
| IZN17[Q575A] | <i>IKKEIEAIKKEQEAIKKKIEAIEKLL</i> <u>QLTVWGIKAL</u> QARIL                    |
| IZN17[Q577A] | <i>IKKEIEAIKKEQEAIKKKIEAIEKLL</i> <u>QLTVWGIKQLA</u> ARIL                    |
| IZN17[R579A] | <i>IKKEIEAIKKEQEAIKKKIEAIEKLL</i> <u>QLTVWGIKQLQA</u> AIL                    |
| IZN17[L581A] | <i>IKKEIEAIKKEQEAIKKKIEAIEKLL</i> <u>QLTVWGIKQLQARIA</u>                     |

<sup>1</sup>The HR1 sequence corresponds to residues 540-588 of the HIV-HXB2 protein. <sup>2</sup>Non-HIV residues, italics; HIV residues, underlined. <sup>3</sup>C-terminal carboxamide and N terminal acetyl for all peptides except for IQN17, N-terminal biotinylated
