# Supplementary material
Source: PubMed Central journal article supplement (PMC1253587)

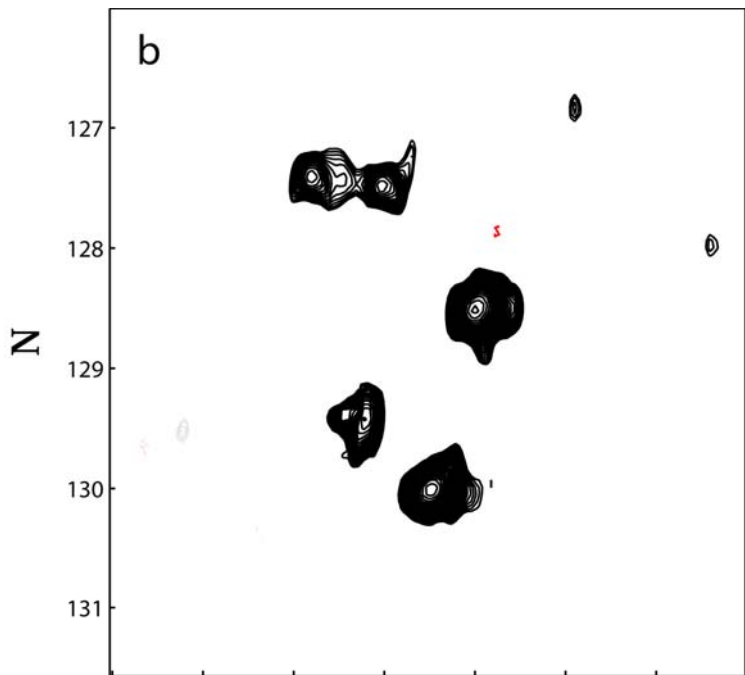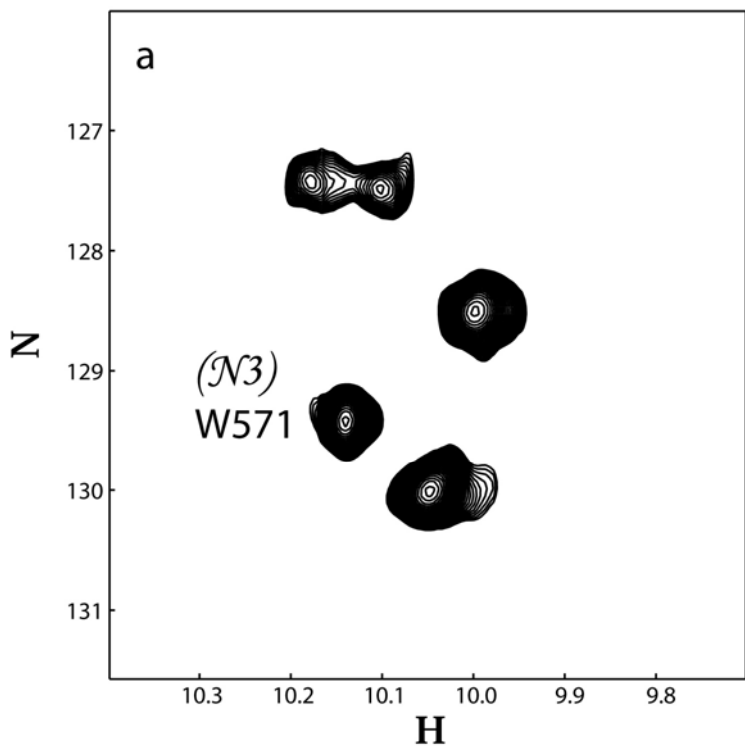

Supplement: pnas_0506927102_2.pdf [file pnas_0506927102_2.pdf]

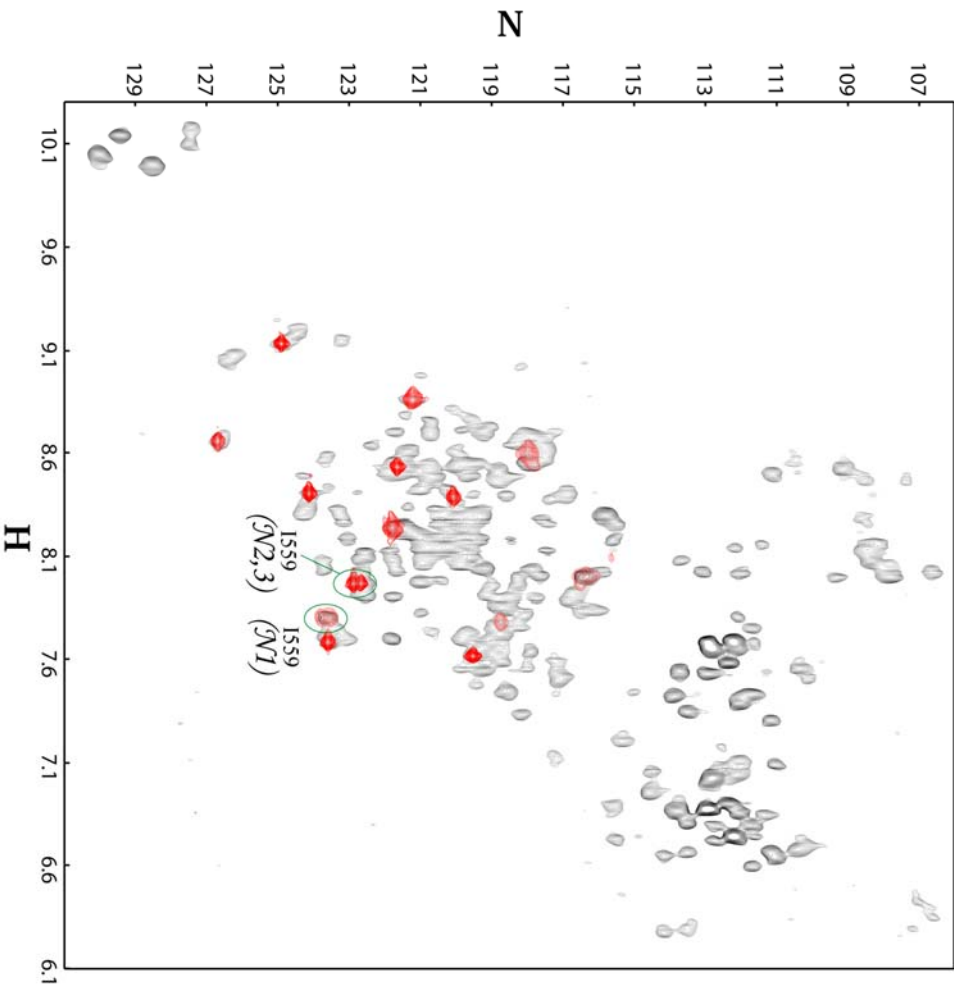

Supplement: pnas_0506927102_3.pdf [file pnas_0506927102_3.pdf]

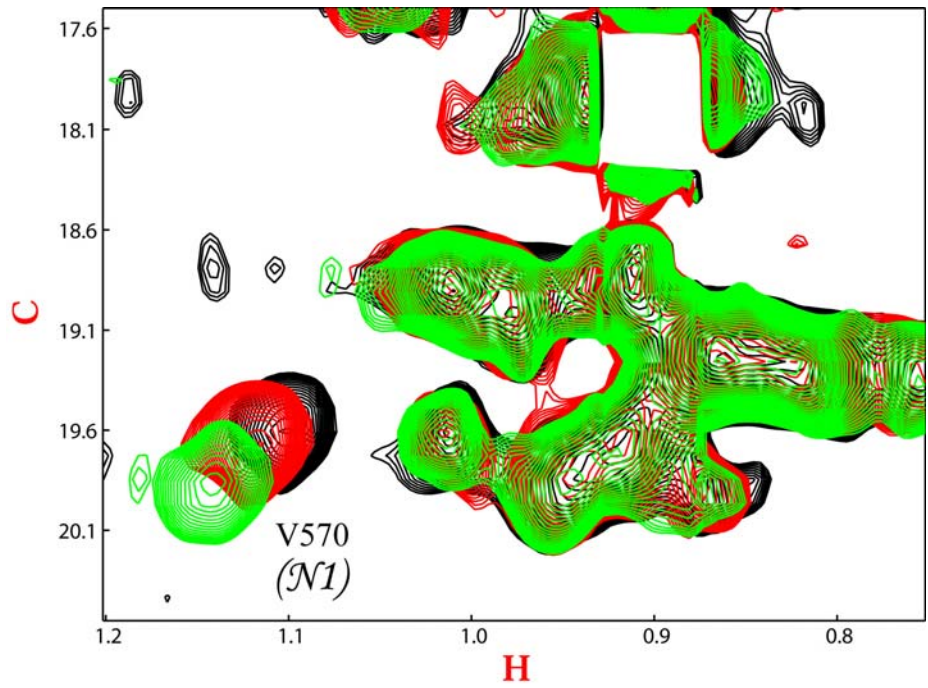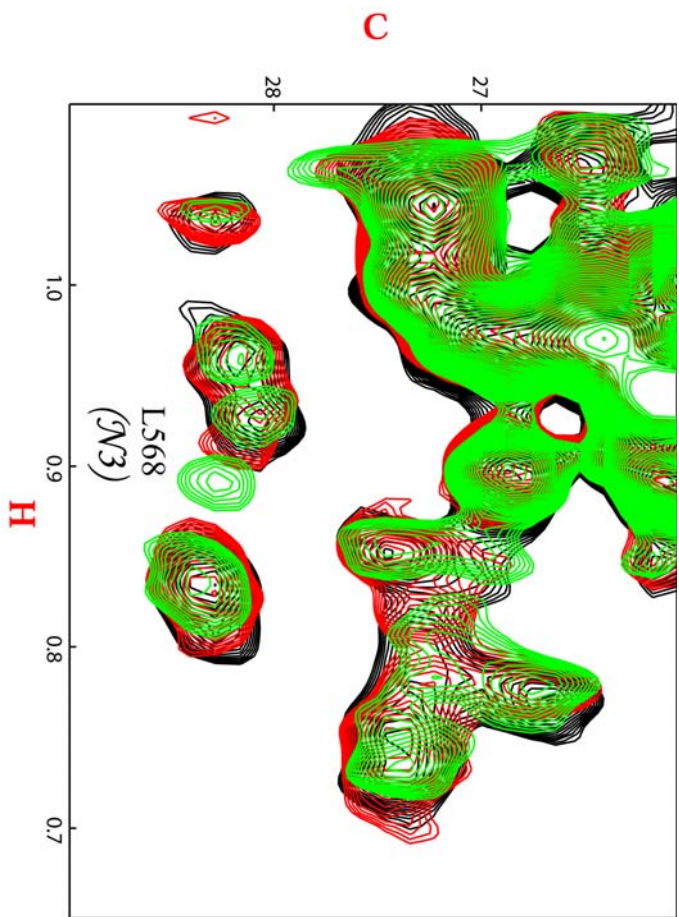

Supplement: pnas_0506927102_4.pdf [file pnas_0506927102_4.pdf]
